# Supplementary material for: Development of a simple method to quantify fipronil and its intermediates in soil
Source: Royal Society of Chemistry journal article supplement (doi:10.1039/d0ay00924e), 2020-01-01
Supplement: d0ay00924e1.pdf [file d0ay00924e1.pdf]

1 Figures. Supplement Material

2

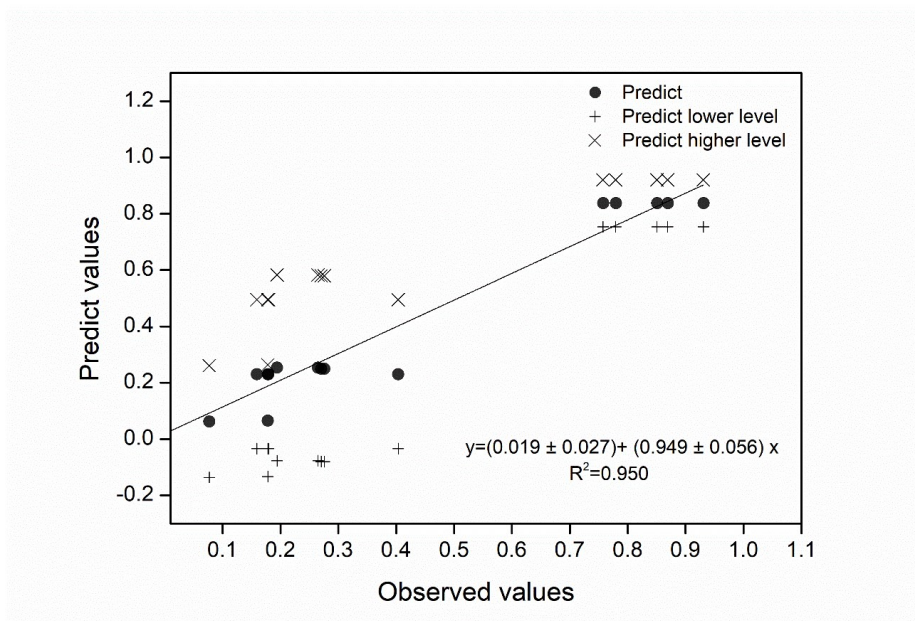

3

4 Figure S1. Observed values *versus* predicted values to evaluation of the quadratic model  
5 fitted to overall desirability

6

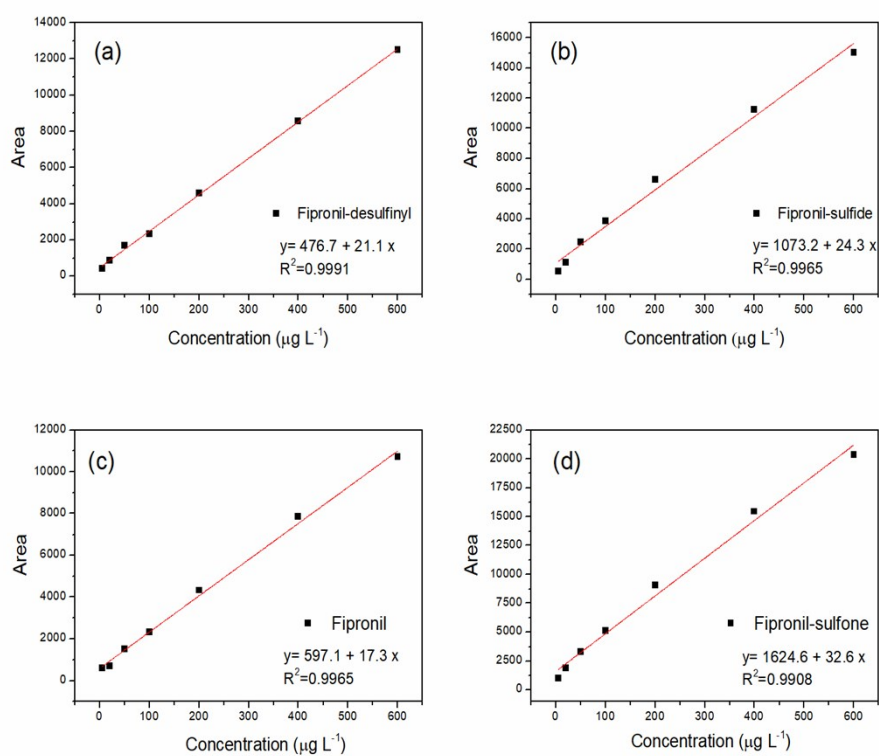

7

8 Figure S2. Analytical curve of (a) fipronil-desulfinyl; (b) fipronil-sulfide; (c) fipronil and (d)

9 fipronil-sulfone.

10

11
